# Supplementary material for: Synthesis and photophysical and mechanochromic properties of novel 2,3,4,6-tetraaryl-4H-pyran derivatives
Source: Royal Society of Chemistry journal article supplement (doi:10.1039/d0ce01021a), 2020-01-01
Supplement: d0ce01021a1.pdf [file d0ce01021a1.pdf]

# Electronic Supplementary Information

## **Synthesis, photophysical and mechanochromic properties of novel 2,3,4,6-tetraaryl-4*H*-pyran derivatives**

Yufeng Xie, Zhiqiang Wang, Xiaoqing Liu, Miaochang Liu, Yunxiang Lei,\* Yunbing Zhou, Wenxia Gao, Xiaobo Huang\* and Huayue Wu\*

College of Chemistry and Materials Engineering, Wenzhou University, Wenzhou 325035, P. R. China

E-mail: 173612907@qq.com (Y. Lei), xiaobhuang@wzu.edu.cn (X. Huang), huayuewu@wzu.edu.cn (H. Wu)

## Contents:

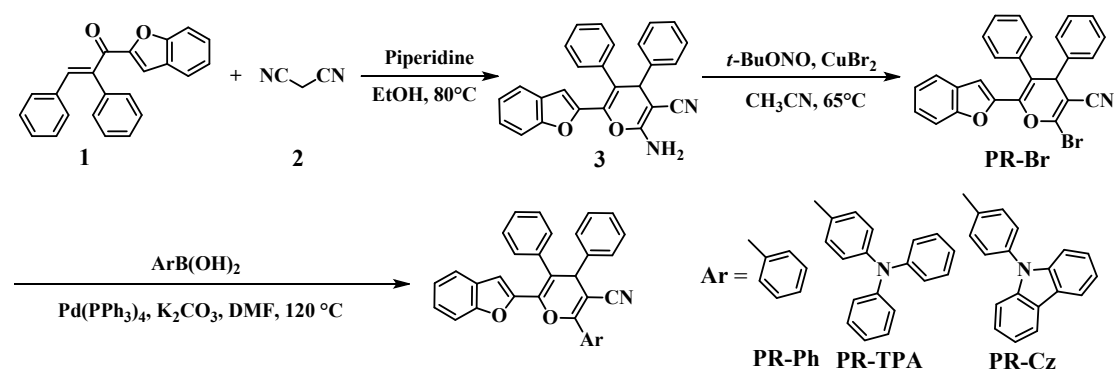

**Scheme S1** Synthetic routes of PR-Ph, PR-TPA, and PR-Cz.

## 1. Experimental

### Measurements and materials

NMR spectra were determined using a Bruker DRX 500 NMR spectrometer using dimethyl sulfoxide (DMSO-*d*<sub>6</sub>) or tetrahydrofuran (THF-*d*<sub>8</sub>) as a solvent and trimethylsilane as a reference. Melting points were determined on a WRS-1B digital melting point meter and were uncorrected. HRMS-ESI mass spectra were conducted on a Hitachi Nano Frontier LD spectrometer. UV-vis absorption spectra were performed with a UV-3600 Shimadzu spectrophotometer. Fluorescence spectra were performed with a HITACHI F-7000 fluorometer. The absolute fluorescence quantum yields and fluorescence lifetime decays were performed using a Jobin Yvon Horiba FluoroMax-4 fluorometer. The X-ray powder diffraction (XRD) data were conducted on a Bruker X-ray diffractometer. The measurements of the average particle sizes of the aggregates in solution were determined using a Zetasizer Nano ZS Laser Particle Size Analyzer. Differential scanning calorimetry (DSC) experiments were obtained using a TA-DSC Q2000 at a heating rate of 10 °C/min. The X-ray crystallographic analyses were conducted on a Bruker SMART II CCD area detector. (*E*)-1-(Benzofuran-2-yl)-2,3-diphenylprop-2-en-1-one (**1**) was synthesized according to the previous report.<sup>1</sup> Malononitrile (**2**), piperidine, *tert*-butyl nitrite, and various aromatic boric acids were purchased from commercial suppliers.

### Synthesis of 2-amino-6-(benzofuran-2-yl)-4,5-diphenyl-4H-pyran-3-carbonitrile (**3**)

A mixture of compound **1** (0.81 g, 2.5 mmol), compound **2** (0.33 g, 5.0 mmol), piperidine (0.21 g, 2.5 mmol), and ethyl alcohol (10 mL) was heated at 80°C for 1.5 h. After cooling to the room temperature, a large amount of solids separated out. After vacuum filtration, the crude product was washed with ethyl alcohol three times and then afforded compound **3**. White solid (0.63 g), 64.6% yield, m. p. 238.8-229.6°C. <sup>1</sup>H NMR (DMSO-*d*<sub>6</sub>, 500 MHz): δ 7.55 (d, *J* = 8.0 Hz, 1H), 7.31-7.26 (m, 4H), 7.21-7.16 (m, 7H), 7.02-7.00 (m, 4H), 6.61 (s, 1H), 4.41 (s, 1H) ppm. <sup>13</sup>C NMR (DMSO-

$d_6$ , 125 MHz):  $\delta$  159.6, 153.6, 148.1, 143.2, 136.5, 135.6, 128.8, 128.5, 128.0, 127.7, 127.6, 127.03, 126.98, 125.3, 123.2, 121.4, 119.9, 110.9, 107.4, 57.1, 45.0 ppm. HRMS (ESI)  $m/z$ :  $[M+H]^+$  calculated for  $C_{26}H_{19}N_2O_2$ , 391.1441; found, 391.1442.

#### Synthesis of 6-(benzofuran-2-yl)-2-bromo-4,5-diphenyl-4H-pyran-3-carbonitrile (PR-Br)

A mixture of compound **3** (0.98 g, 2.5 mmol), *tert*-butyl nitrite (0.52 g, 5.0 mmol), copper (II) bromide (0.72 g, 5.0 mmol), and acetonitrile (10 mL) was heated at 65°C for 30 min. After cooling to the room temperature, a large amount of solids separated out. The crude product was obtained by vacuum filtration and then purified by a silica gel column chromatography using petroleum ether/ethyl acetate (v:v = 20:1) as the eluent to give pure **PR-Br**. Yellow solid (0.30 g), 26.4% yield, m. p. 175.5-176.2°C.  $^1H$  NMR (DMSO- $d_6$ , 500 MHz):  $\delta$  7.55 (d,  $J$  = 8.0 Hz, 1H), 7.38-7.35 (m, 3H), 7.32-7.28 (m, 4H), 7.26-7.20 (m, 4H), 7.04 (d,  $J$  = 7.5 Hz, 2H), 6.55 (s, 1H), 4.84 (s, 1H) ppm.  $^{13}C$  NMR (DMSO- $d_6$ , 125 MHz):  $\delta$  153.7, 146.4, 139.99, 139.96, 137.4, 135.0, 129.0, 128.7, 128.4, 128.3, 128.2, 128.1, 127.0, 126.9, 125.8, 123.4, 121.7, 118.7, 116.7, 111.1, 108.3, 95.1, 46.3 ppm. HRMS (ESI)  $m/z$ :  $[M+H]^+$  calculated for  $C_{26}H_{17}BrNO_2$ , 454.0437; found, 454.0467.

#### General procedure for PR-Ph, PR-TPA and PR-Cz.

A mixture of **PR-Br** (2.5 mmol), phenylboronic acid/(4-(diphenylamino)phenyl)boronic acid/ (4-(9H-carbazol-9-yl)phenyl)boronic acid (5.0 mmol),  $K_2CO_3$  (5.0 mmol),  $Pd(PPh_3)_4$  (1 mol %), and DMF (10 mL) was stirred at 120°C under nitrogen for 12 h. The reaction mixture was extracted with  $CH_2Cl_2$  (50 mL $\times$ 3). The organic layer was washed with water and then brine, dried over anhydrous  $Na_2SO_4$ , and then evaporated in vacuum to dryness. The residue was purified by a silica gel column chromatography using petroleum ether/ethyl acetate (v:v = 80:1) as the eluent to afford pure target compound.

**6-(Benzofuran-2-yl)-2,4,5-triphenyl-4H-pyran-3-carbonitrile (PR-Ph)**. Pale yellow solid (0.80 g), 72.5% yield, m. p. 127.4-128.1 °C.  $^1H$  NMR (DMSO- $d_6$ , 500 MHz):  $\delta$  7.91 (d,  $J$  = 6.5 Hz, 2H), 7.63-7.57 (m, 4H), 7.40-7.35 (m, 4H), 7.31-7.20 (m, 7H), 7.08 (d,  $J$  = 6.5 Hz, 2H), 6.76 (s, 1H), 4.77 (s, 1H) ppm.  $^{13}C$  NMR (DMSO- $d_6$ , 125 MHz):  $\delta$  158.9, 153.7, 147.8, 141.4, 136.8, 135.9, 131.6, 130.8, 129.0, 128.91, 128.85, 128.4, 128.2, 128.0, 127.9, 127.8, 127.2, 125.6, 123.4, 121.6, 118.1, 117.9, 111.1, 107.7, 88.7, 45.8 ppm. HRMS (EI)  $m/z$ :  $[M]^+$  calculated for  $C_{32}H_{21}NO_2$ , 451.1572; found, 451.1567.

**6-(Benzofuran-2-yl)-2-(4-(diphenylamino)phenyl)-4,5-diphenyl-4H-pyran-3-carbonitrile (PR-TPA)**. Pale yellow solid (1.28 g), 83.0% yield, m. p. 176.2-176.5 °C.  $^1H$  NMR (THF- $d_8$ , 500 MHz):  $\delta$  7.92 (d,  $J$  = 8.5 Hz, 2H), 7.46 (d,  $J$  = 7.5 Hz, 1H), 7.36-7.05 (m, 25H), 6.68 (s, 1H), 4.47 (s, 1H) ppm.  $^{13}C$  NMR (THF- $d_8$ , 125 MHz):  $\delta$  159.2, 155.5, 151.6, 149.8, 147.9, 143.1, 138.8, 138.0, 130.4, 130.0, 129.8, 129.7, 129.2, 129.0, 128.7, 128.6, 128.5, 126.6, 126.0, 125.1, 124.4, 123.9, 122.1, 121.4, 119.2, 119.0, 111.9, 108.1, 88.0, 48.5 ppm. HRMS (ESI)  $m/z$ :  $[M+Na]^+$

calculated for C<sub>44</sub>H<sub>30</sub>N<sub>2</sub>O<sub>2</sub>Na, 641.2205; found, 641.2209.

**2-(4-(9H-Carbazol-9-yl)phenyl)-6-(benzofuran-2-yl)-4,5-diphenyl-4H-pyran-3-carbonitrile (PR-Cz).** Pale yellow solid (1.25 g), 81.2% yield, m. p. 119.2-122.5 °C. <sup>1</sup>H NMR (DMSO-*d*<sub>6</sub>, 500 MHz): δ 8.28 (d, *J* = 7.5 Hz, 2H), 8.23 (d, *J* = 8.5 Hz, 2H), 7.90 (d, *J* = 8.0 Hz, 2H), 7.60 (d, *J* = 7.5 Hz, 1H), 7.53-7.46 (m, 4H), 7.41-7.40 (m, 4H), 7.35-7.31 (m, 4H), 7.28-7.21 (m, 5H), 7.13-7.11 (m, 2H), 6.85 (s, 1H), 4.84 (s, 1H) ppm. <sup>13</sup>C NMR (DMSO-*d*<sub>6</sub>, 125 MHz): δ 157.8, 153.7, 147.8, 141.3, 139.6, 136.8, 135.8, 129.6, 129.2, 129.0, 128.8, 128.4, 128.2, 128.0, 127.9, 127.1, 126.6, 126.4, 125.5, 123.3, 123.1, 121.6, 120.5, 118.0, 117.9, 111.0, 109.7, 107.7, 88.8, 45.7 ppm. HRMS (ESI) *m/z*: [M+Na]<sup>+</sup> calculated for C<sub>44</sub>H<sub>28</sub>N<sub>2</sub>O<sub>2</sub>Na, 639.2049; found, 639.2043.

### Lippert-Mataga plots of PR-TPA and PR-Cz in organic solvents

The effect of solvent polarity on the optical properties of **PR-TPA** and **PR-Cz** are investigated by Lippert-Mataga equation listed as follows:  $\Delta\nu = 2(\mu_e - \mu_g)^2 \Delta f / hca^3 + C$ , which describes the interactions between the solvent and the dipole moment of a fluorescent molecule.<sup>2</sup> Herein,  $\Delta\nu$  is Stokes shifts of the fluorescent molecule based on the equation:  $\Delta\nu = \nu_{\text{abs}} - \nu_{\text{em}}$ .  $\mu_g$  and  $\mu_e$  are the dipole moments in the ground state and the excited state, respectively.  $h$  and  $c$  are the Planck constant and the speed of light, respectively, and  $a$  is the radius of the fluorescent molecule.  $\Delta f$  is the solvent polarity parameter of solvent, which is obtained from the following equation:  $(\epsilon - 1)/(2\epsilon + 1) - (n^2 - 1)/(2n^2 + 1)$ , herein,  $\epsilon$  and  $n$  are the dielectric constant and refractive index of the solvent, respectively.  $\Delta f$  values for the various solvents are calculated from known values of  $\epsilon$  and  $n$ . The dependence of the  $\Delta\nu$  values of **PR-TPA** and **PR-Cz**, which are obtained from on the emission and absorption spectra in different solvents, on the solvent polarity parameter  $\Delta f$  are fitted to linear function, providing the Lippert-Mataga plots of **PR-TPA** and **PR-Cz**.

### References

1. L. Shan, G. Wu, M. Liu, W. Gao, J. Ding, X. Huang, H. Wu, *Org. Chem. Front.*, 2018, **5**, 1651–1654.
2. (a) J. R. Lakowicz, *Principles of fluorescence spectroscopy*. New York: Plenum Press; 1983. p. 190; (b) H. Li, Y. Guo, Y. Lei, W. Gao, M. Liu, J. Chen, Y. Hu, X. Huang and H. Wu, *Dyes Pigm.*, 2015, **112**, 105–115.

## 2. Figures and tables

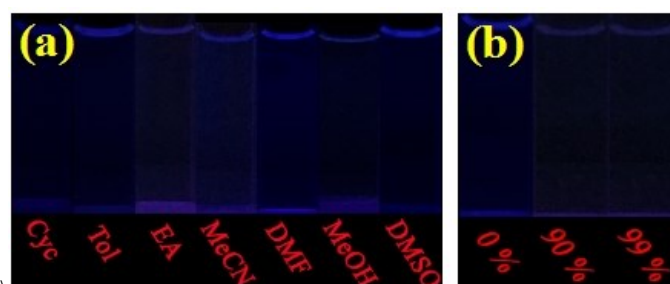

**Fig. S1** (a) Fluorescence photos of **PR-Ph** in different solvents at a concentration of  $1 \times 10^{-5}$  mol/L under UV irradiation (365 nm). (b) Fluorescence photos of **PR-Ph** in the THF-water mixtures ( $1 \times 10^{-5}$  mol/L) at  $f_w = 0, 90\%$ , and  $99\%$  under UV irradiation (365 nm).

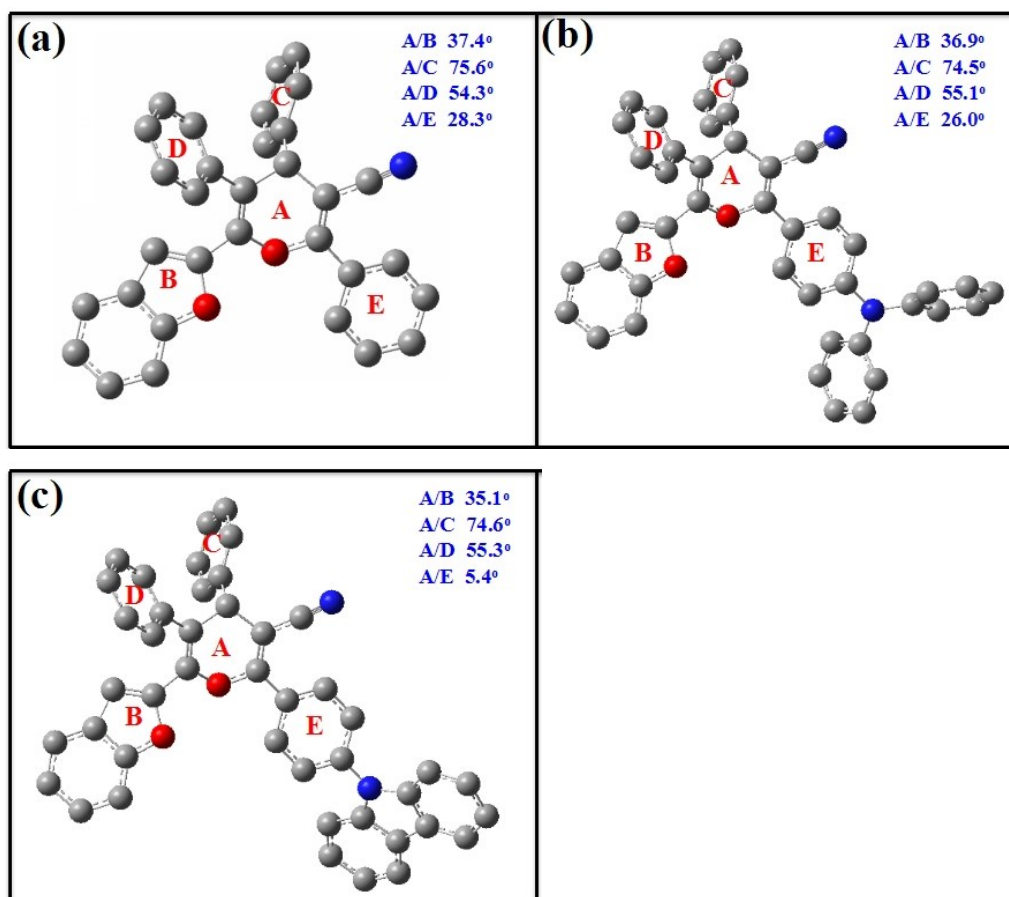

**Fig. S2** The optimized molecular conformations and the dihedral angles of **PR-Ph** (a), **PR-TPA** (b), and **PR-Cz** (c) between the central 4H-pyran ring and the surrounding aromatic rings by the calculation using the B3LYP/6-311+G\*\* basis set.

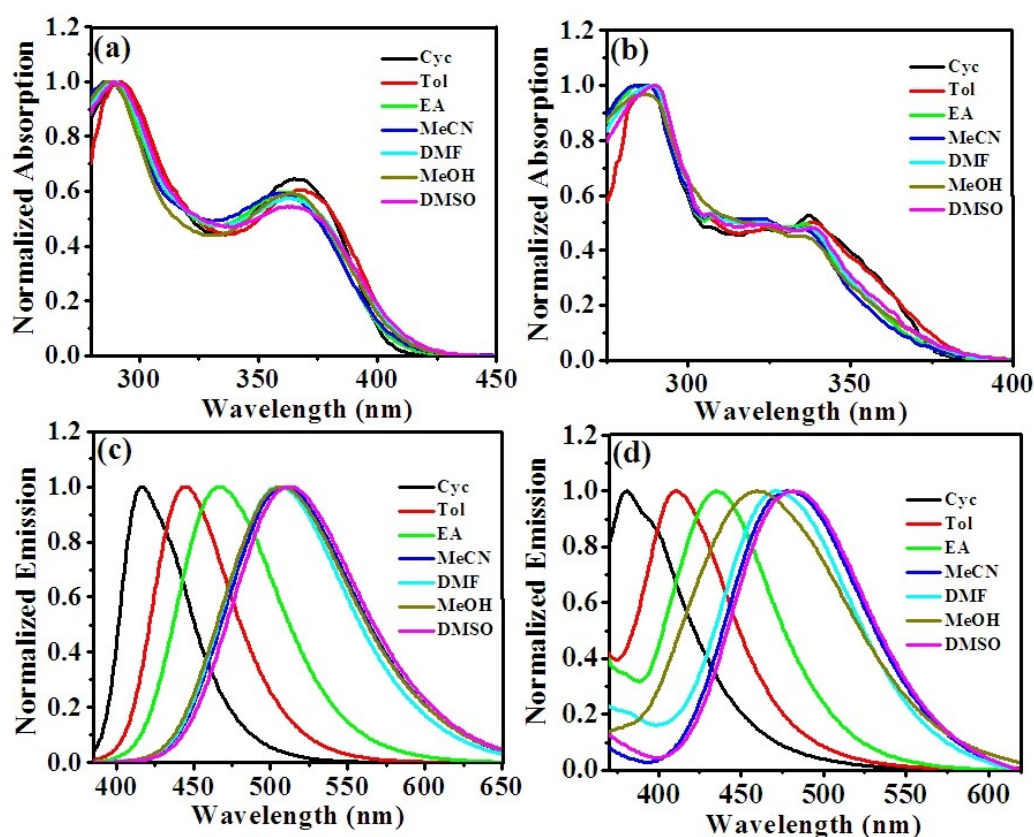

**Fig. S3** Normalized absorption and fluorescence spectra of **PR-TPA** (a, c) and **PR-Cz** (b, d) in different solvents at a concentration of  $1 \times 10^{-5}$  mol/L.

**Table S1** UV-vis absorption maxima and fluorescence emission maxima of **PR-TPA** and solvent polarity parameter in different solvents

|                                   | Cyc    | Tol    | EA    | DMSO  | DMF   | MeCN  | MeOH  |
|-----------------------------------|--------|--------|-------|-------|-------|-------|-------|
| $\lambda_{\text{abs}}/\text{nm}$  | 366    | 368    | 362   | 364   | 363   | 359   | 364   |
| $\nu_{\text{abs}}/\text{cm}^{-1}$ | 27322  | 27174  | 27624 | 27473 | 27548 | 27855 | 27473 |
| $\lambda_{\text{ex}}/\text{nm}$   | 368    | 370    | 366   | 365   | 367   | 366   | 367   |
| $\lambda_{\text{em}}/\text{nm}$   | 416    | 445    | 457   | 513   | 506   | 509   | 507   |
| $\nu_{\text{em}}/\text{cm}^{-1}$  | 24038  | 22472  | 21413 | 19493 | 19763 | 19646 | 19724 |
| $\Delta\nu/\text{cm}^{-1}$        | 3284   | 4702   | 6211  | 7979  | 7785  | 8209  | 7749  |
| $\Delta f$                        | -0.151 | 0.0135 | 0.2   | 0.263 | 0.276 | 0.305 | 0.308 |

**Table S2** UV-vis absorption maxima and fluorescence emission maxima of **PR-Cz** and solvent polarity parameter in different solvents

|                                   | Cyc    | Tol    | EA    | DMSO  | DMF   | MeCN  | MeOH  |
|-----------------------------------|--------|--------|-------|-------|-------|-------|-------|
| $\lambda_{\text{abs}}/\text{nm}$  | 337    | 338    | 336   | 338   | 337   | 335   | 336   |
| $\nu_{\text{abs}}/\text{cm}^{-1}$ | 29674  | 29586  | 29762 | 29586 | 29674 | 29851 | 29762 |
| $\lambda_{\text{ex}}/\text{nm}$   | 338    | 339    | 335   | 334   | 336   | 335   | 337   |
| $\lambda_{\text{em}}/\text{nm}$   | 380    | 410    | 435   | 482   | 471   | 477   | 460   |
| $\nu_{\text{em}}/\text{cm}^{-1}$  | 26316  | 24390  | 22989 | 20747 | 21231 | 20921 | 21739 |
| $\Delta\nu/\text{cm}^{-1}$        | 3358   | 5196   | 6773  | 8839  | 8443  | 8930  | 8023  |
| $\Delta f$                        | -0.151 | 0.0135 | 0.2   | 0.263 | 0.276 | 0.305 | 0.308 |

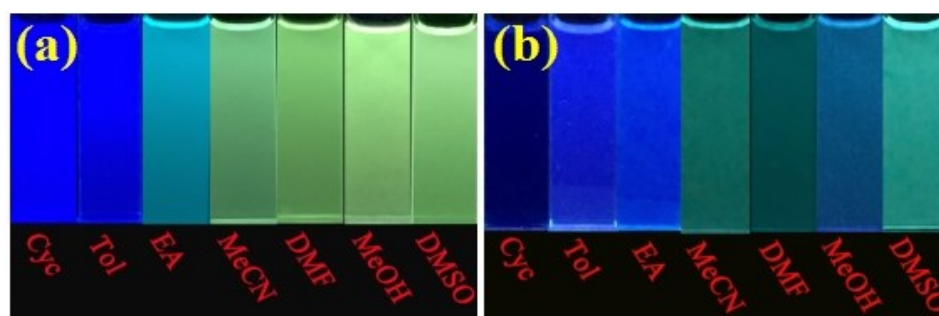

**Fig. S4** Fluorescence photos of **PR-TPA** (a) and **PR-Cz** (b) in different solvents at a concentration of  $1 \times 10^{-5}$  mol/L under UV irradiation (365 nm).

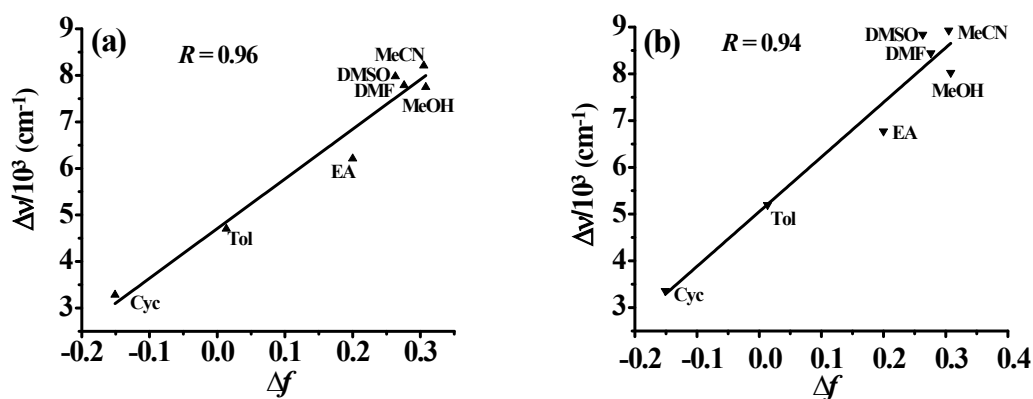

**Fig. S5** Lippert-Mataga plots of Stokes shifts ( $\Delta\nu$ ) of **PR-TPA** (a) and **PR-Cz** (b) vs solvent polarity parameter ( $\Delta f$ ) in various solvents.

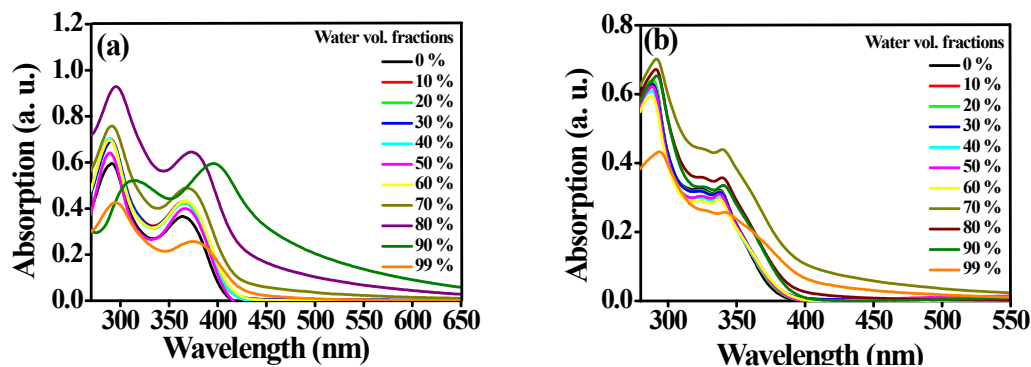

Fig. S6 UV-vis absorption of PR-TPA (a) and PR-Cz (b) in THF-water mixtures ( $1 \times 10^{-5}$  mol/L) with different  $f_w$  values.

Table S3 Average particle size and polydispersity index (PDI) of PR-TPA and PR-Cz in THF-water mixtures with different  $f_w$ .

| Compound | $f_w$ | Average particle size (nm) | PDI   |
|----------|-------|----------------------------|-------|
| PR-TPA   | 70%   | 349                        | 0.120 |
|          | 80%   | 304                        | 0.197 |
|          | 90%   | 171                        | 0.195 |
|          | 99%   | 293                        | 0.250 |
| PR-Cz    | 80%   | 338                        | 0.114 |
|          | 90%   | 149                        | 0.246 |
|          | 99%   | 181                        | 0.191 |

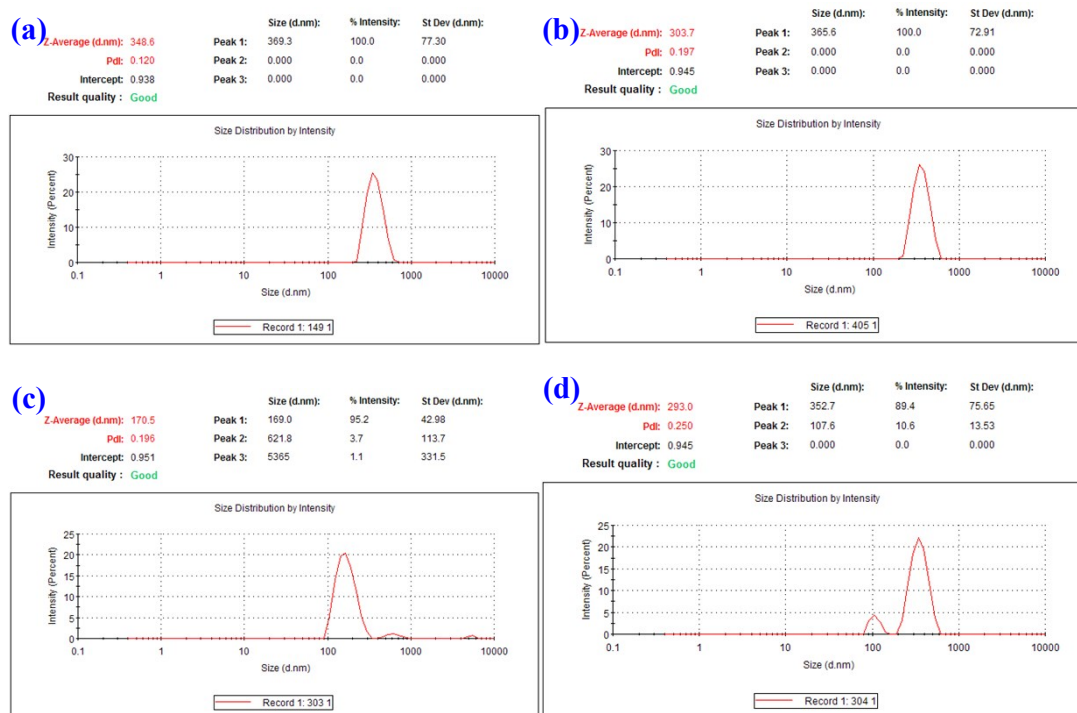

Fig. S7 The average particle size and PDI of PR-TPA in THF-water mixture with  $f_w = 70\%$  (a),



80% (b), 90% (c), and 99% (d), respectively.

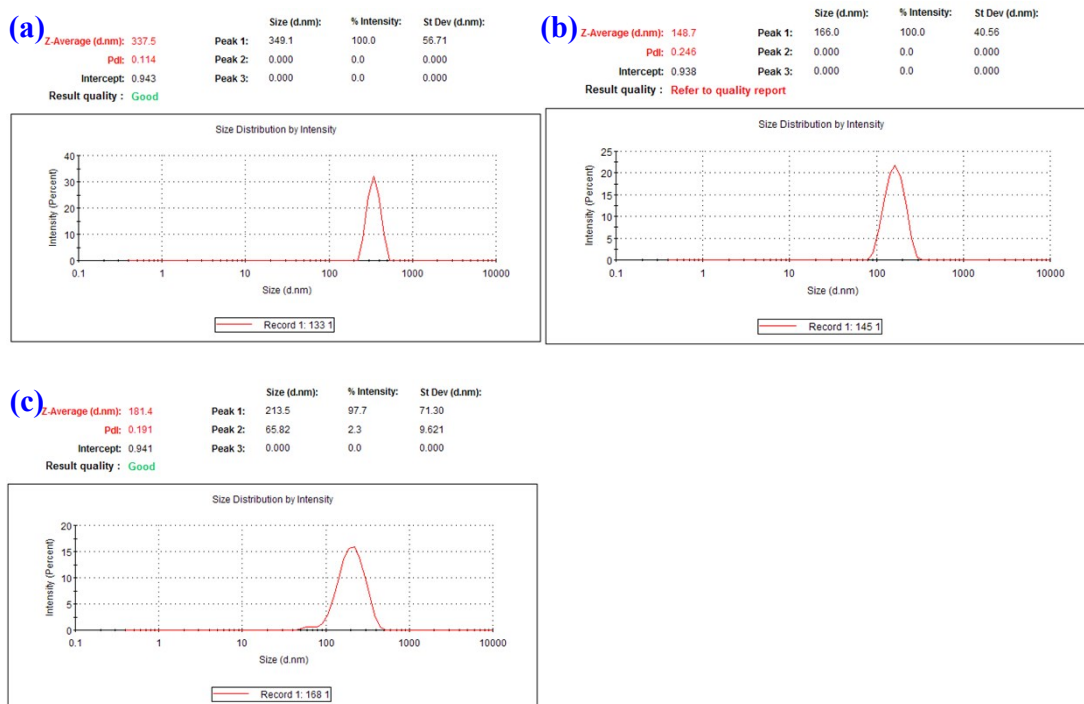

**Fig. S8** The average particle size and PDI of PR-Cz in THF-water mixture with  $f_w = 80\%$  (a),  $90\%$  (b), and  $99\%$  (c), respectively.

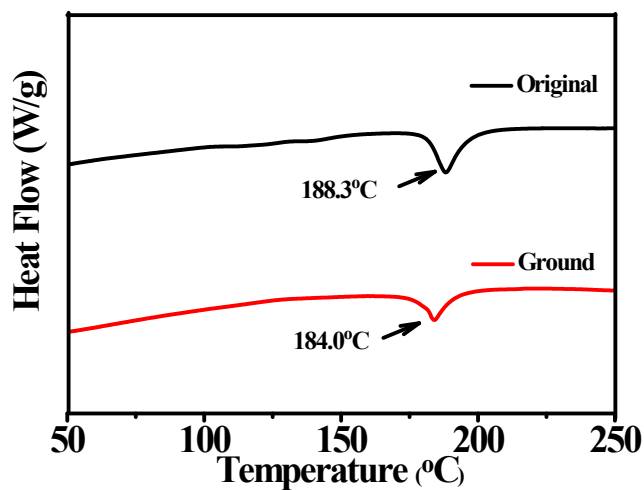

**Fig. S9** DSC curves of the original sample of PR-TPA before and after grinding.

**Table S4** Crystallographic data of the single crystals of **PR-Br** and **PR-TPA**

|                                                             | <b>PR-Br</b>                                      | <b>PR-TPA</b>                                                 |
|-------------------------------------------------------------|---------------------------------------------------|---------------------------------------------------------------|
| CCDC (No.)                                                  | 2016180                                           | 2016181                                                       |
| Empirical formula                                           | C <sub>26</sub> H <sub>16</sub> BrNO <sub>2</sub> | C <sub>44</sub> H <sub>30</sub> N <sub>2</sub> O <sub>2</sub> |
| Formula weight                                              | 454.31                                            | 618.70                                                        |
| Temperature (K)                                             | 293(2)                                            | 216.58                                                        |
| Crystal system                                              | Monoclinic                                        | Monoclinic                                                    |
| Space group                                                 | <i>P</i> 2(1)/ <i>c</i>                           | <i>P</i> ̄1 2(1)/ <i>c</i> 1                                  |
| <i>Z</i>                                                    | 4                                                 | 4                                                             |
| <i>D</i> <sub>calcd</sub> [Mg/m <sup>3</sup> ]              | 1.435                                             | 1.063                                                         |
| <i>F</i> (000)                                              | 920                                               | 1296                                                          |
| $\theta$ range [°]                                          | 2.734-25.998                                      | 2.421-24.999                                                  |
| <i>R</i> <sub>1</sub> [ <i>I</i> >2 $\sigma$ ( <i>I</i> )]  | 0.0346                                            | 0.0676                                                        |
| <i>wR</i> <sub>2</sub> [ <i>I</i> >2 $\sigma$ ( <i>I</i> )] | 0.0818                                            | 0.1593                                                        |
| <i>a</i> [Å]                                                | 9.6941(3)                                         | 21.061(2)                                                     |
| <i>b</i> [Å]                                                | 18.5267(5)                                        | 10.0830(12)                                                   |
| <i>c</i> [Å]                                                | 11.8970(3)                                        | 19.630(2)                                                     |
| $\alpha$ [deg]                                              | 90                                                | 90                                                            |
| $\beta$ [deg]                                               | 100.2540(10)                                      | 111.986(4)                                                    |
| $\gamma$ [deg]                                              | 90                                                | 90                                                            |
| <i>V</i> [Å <sup>3</sup> ]                                  | 2102.57(10)                                       | 3865.4(7)                                                     |
| GOF                                                         | 1.034                                             | 0.990                                                         |
| <i>R</i> (int)                                              | 0.0346                                            | 0.0956                                                        |
| No. of reflns collected                                     | 22758                                             | 34215                                                         |
| No. of unique reflns                                        | 4116                                              | 6778                                                          |
| <i>R</i> <sub>1</sub> (all data)                            | 0.0525                                            | 0.1270                                                        |
| <i>wR</i> <sub>2</sub> (all data)                           | 0.0907                                            | 0.2003                                                        |

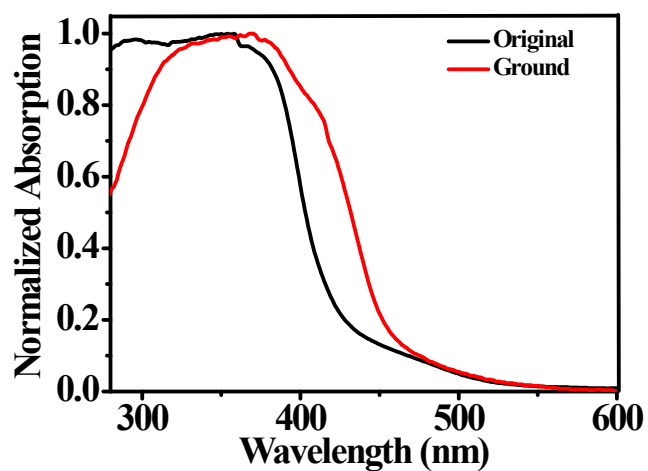**Fig. S10** Absorption spectra of the original and ground samples of **PR-TPA**.

### 3. Spectra of NMR

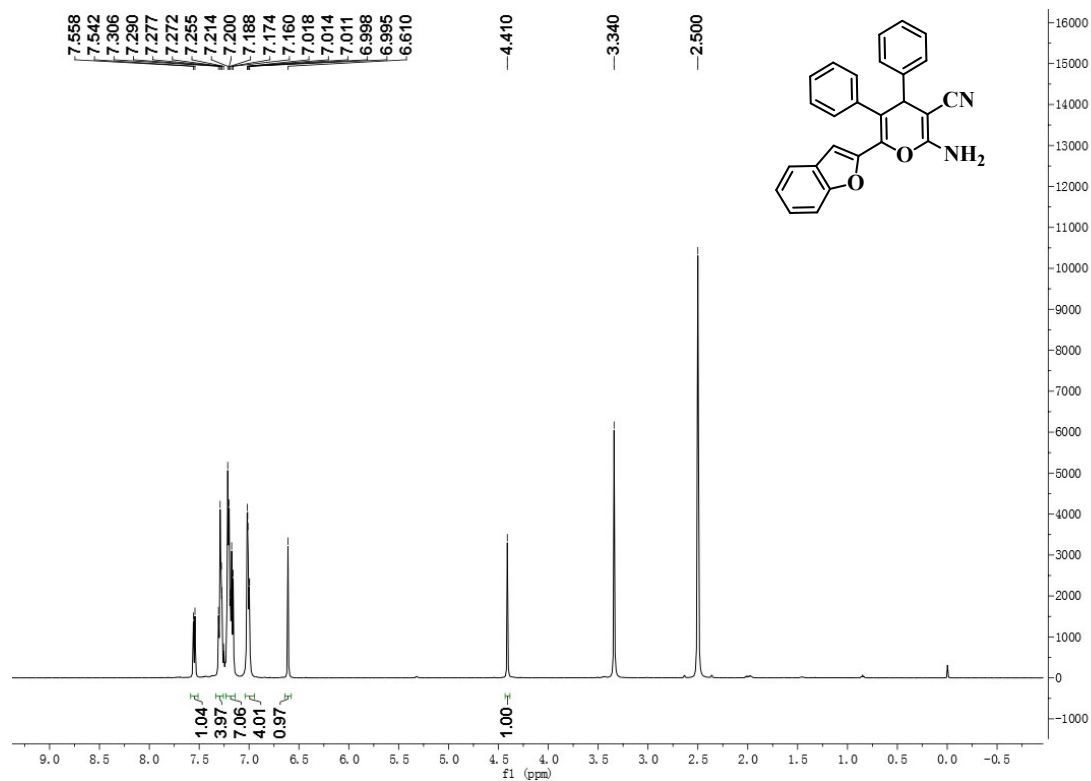

Fig. S11  $^1\text{H}$  NMR of compound 3 (DMSO- $d_6$ , 500 MHz).

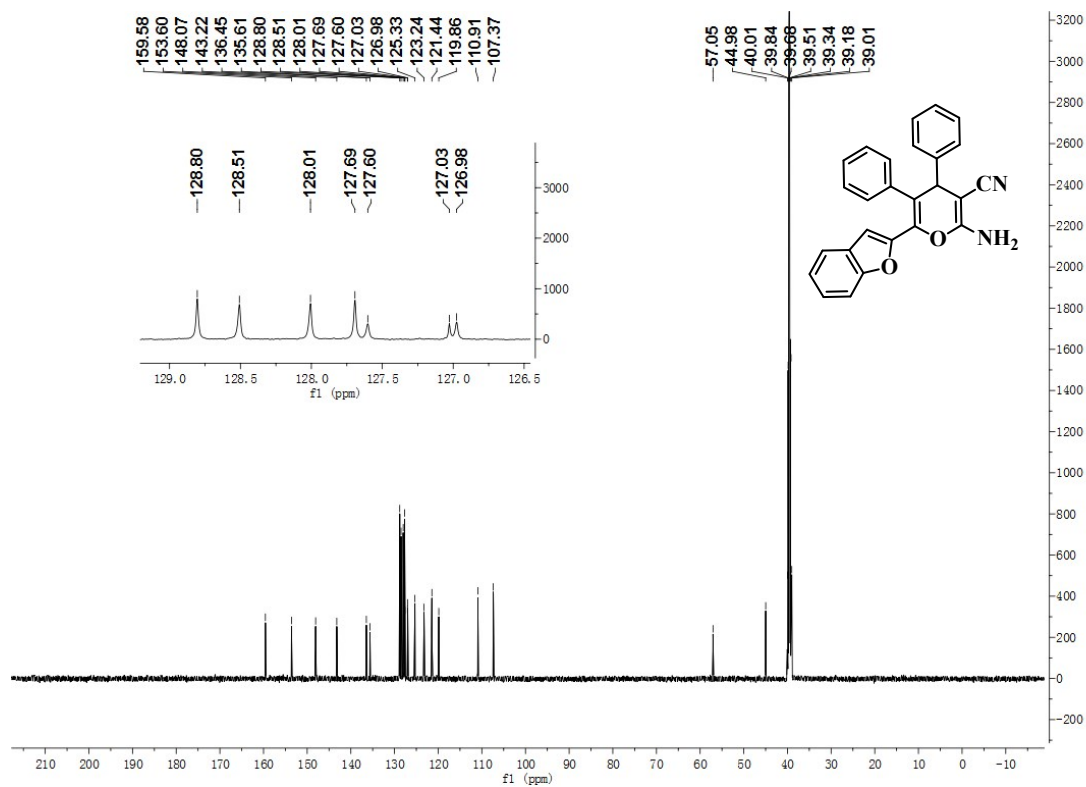

Fig. S12  $^{13}\text{C}$  NMR of compound 3 (DMSO- $d_6$ , 125 MHz).

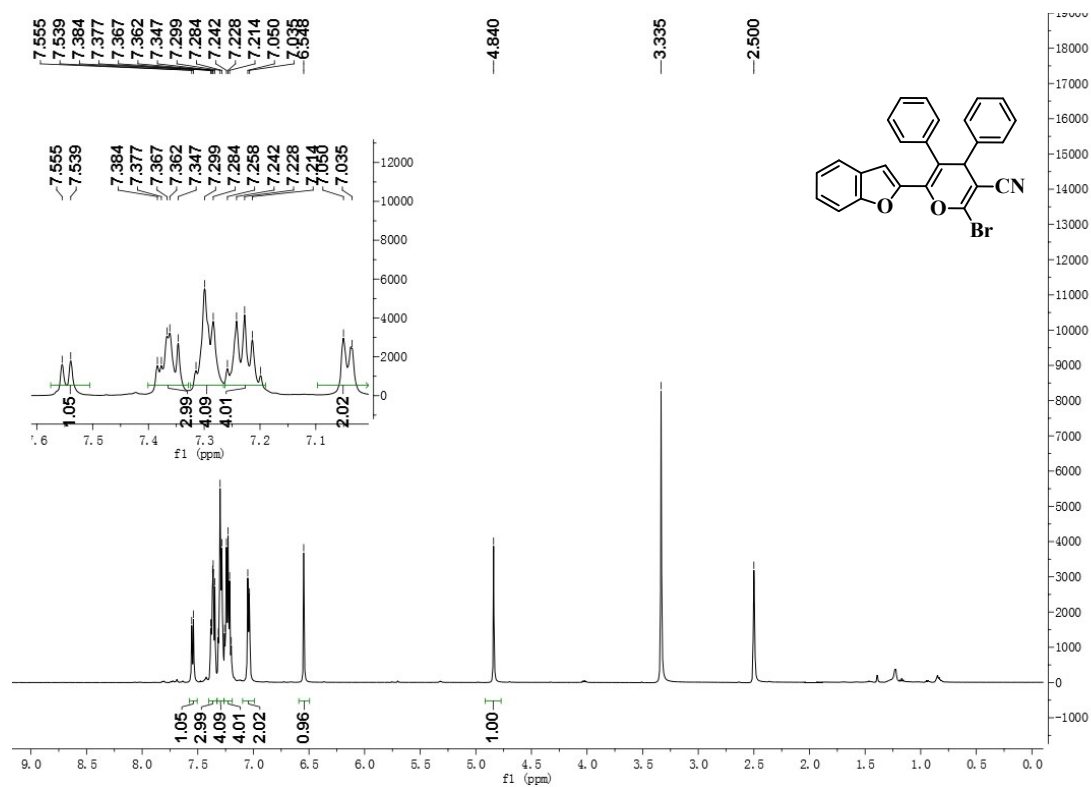

Fig. S13 <sup>1</sup>H NMR of PR-Br (DMSO-*d*<sub>6</sub>, 500 MHz).

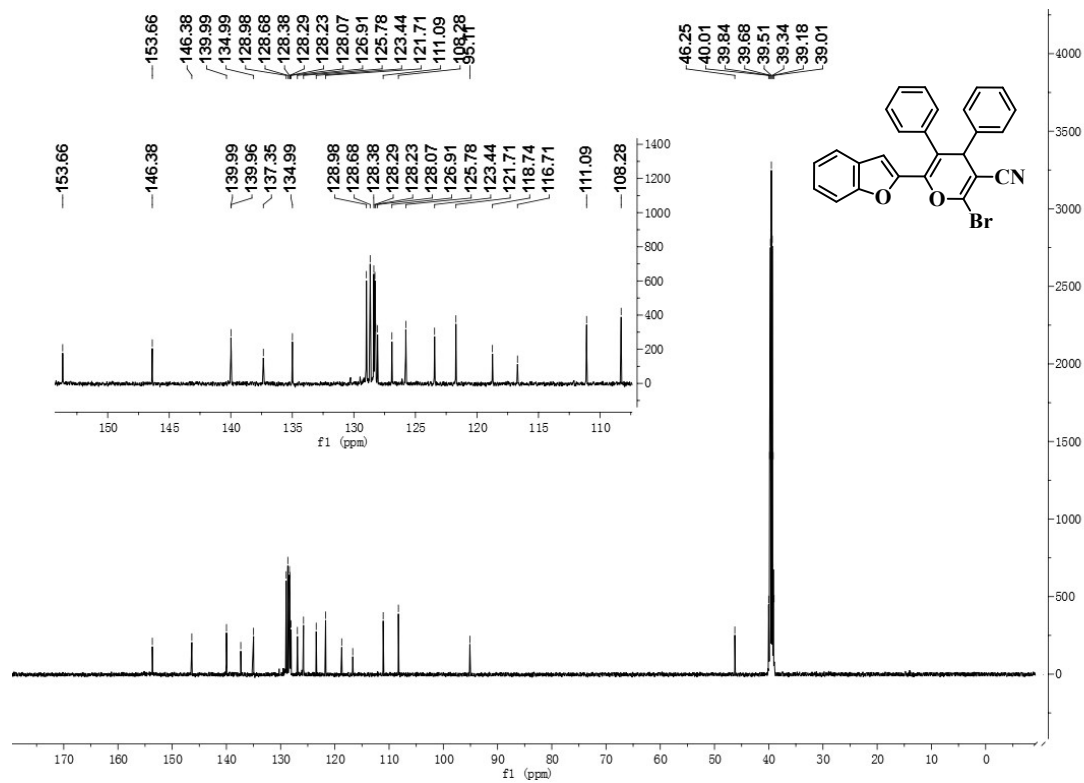

Fig. S14 <sup>13</sup>C NMR of PR-Br (DMSO-*d*<sub>6</sub>, 125 MHz).

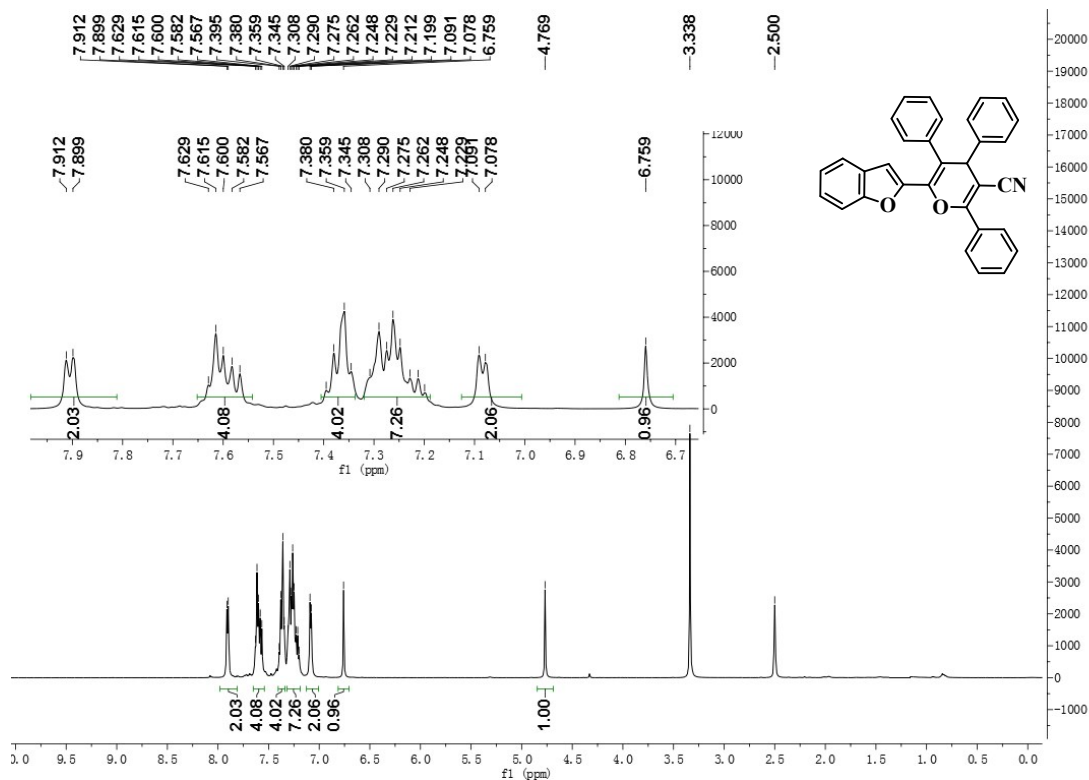

Fig. S15  $^1\text{H}$  NMR of PR-Ph (DMSO- $d_6$ , 500 MHz).

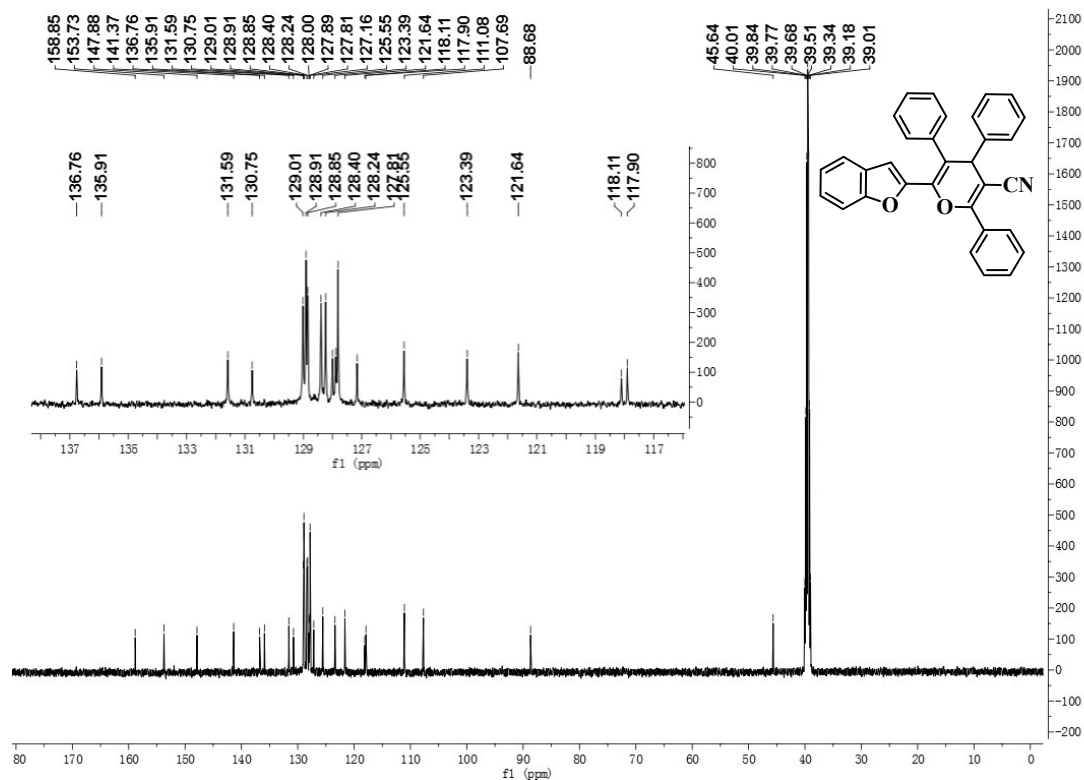

Fig. S16  $^{13}\text{C}$  NMR of PR-Ph (DMSO- $d_6$ , 125 MHz).

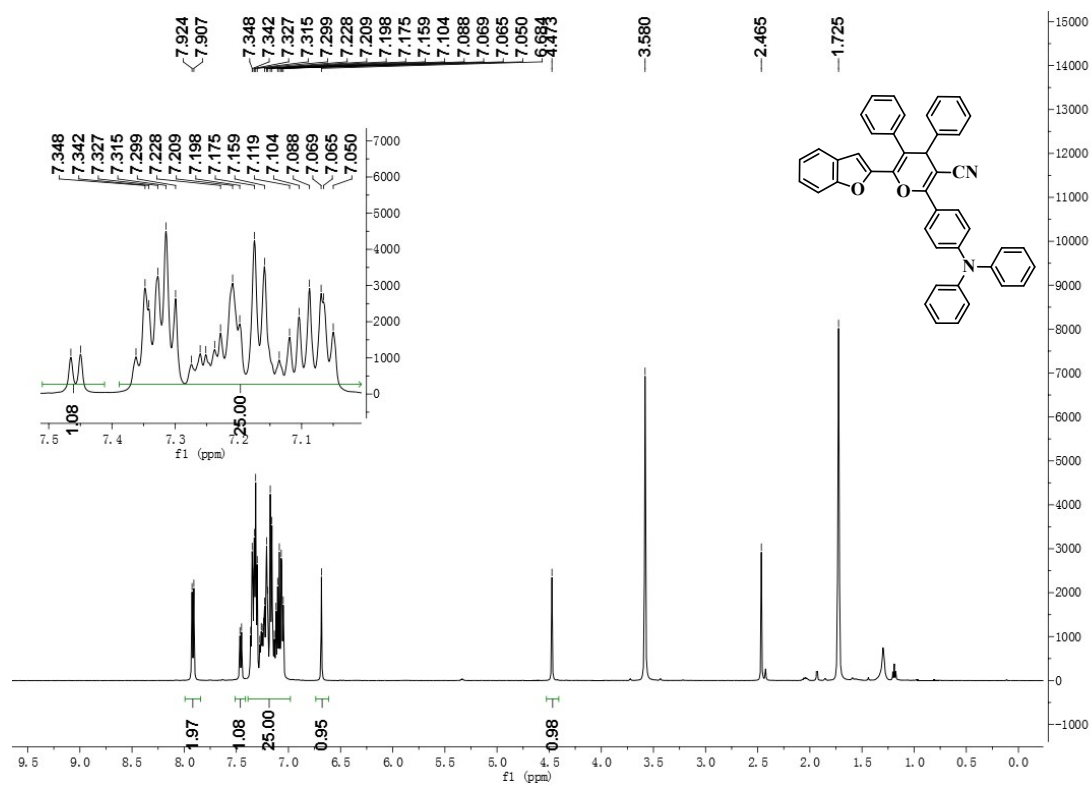

Fig. S17  $^1\text{H}$  NMR of PR-TPA (THF- $d_8$ , 500 MHz).

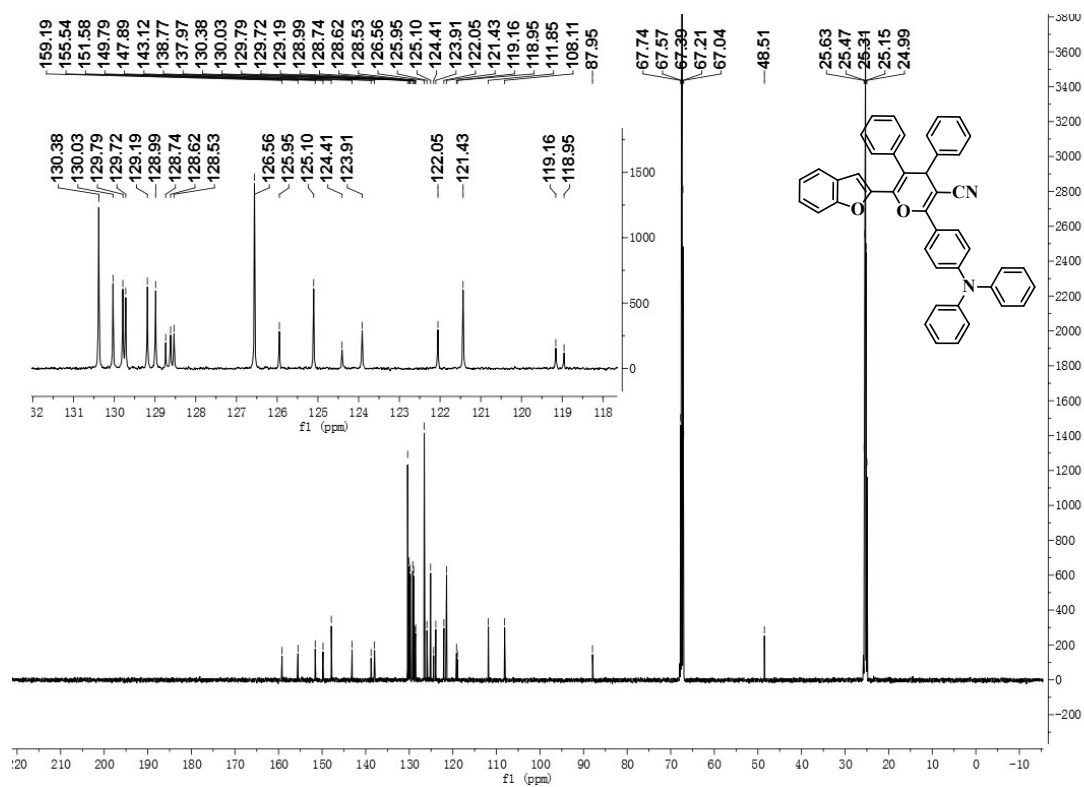

Fig. 18  $^{13}\text{C}$  NMR of PR-TPA (THF- $d_8$ , 125 MHz).

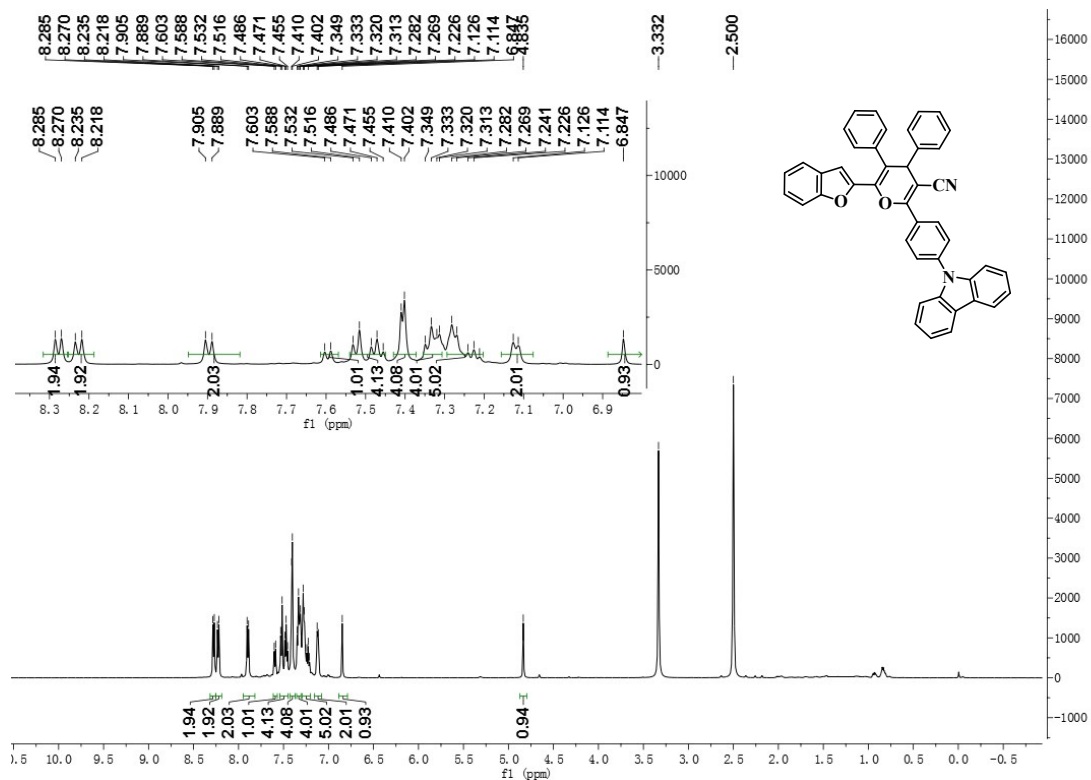

Fig. S19 <sup>1</sup>H NMR of PR-Cz (DMSO-*d*<sub>6</sub>, 500 MHz).

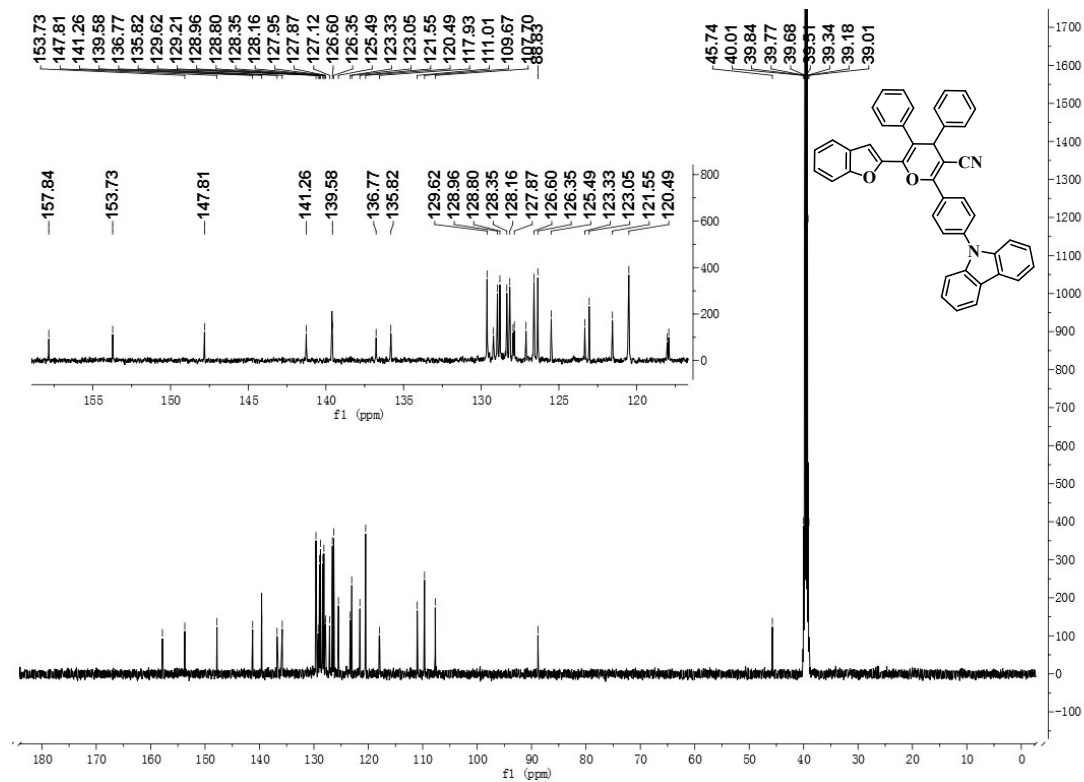

Fig. S20 <sup>13</sup>C NMR of PR-Cz (DMSO-*d*<sub>6</sub>, 125 MHz).
